# Supplementary material for: What determines cell size?
Source: Springer Nature journal article supplement (doi:10.1186/1741-7007-10-101), 2012-12-01
Supplement: 12915_2012_612_MOESM3_ESM.pdf [file 12915_2012_612_MOESM3_ESM.pdf]

(a)

Appropriate cell size

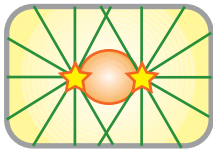

Central positioning  
of centrosomes

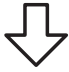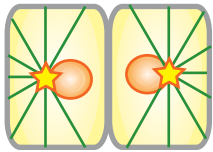

Symmetric  
cell division

Too large of a cell

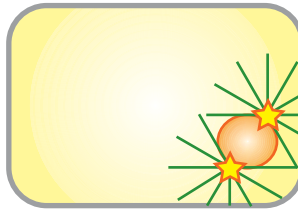

Centrosomes do not  
reach the cell centre

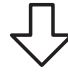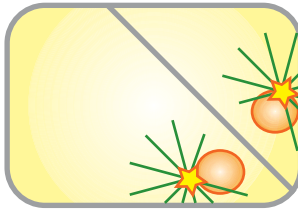

Nonsymmetric  
cell division

Too small of a cell

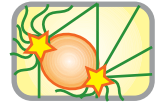

Centrosome position  
is unstable

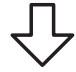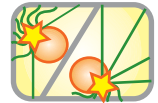

Nonsymmetric  
cell division

(b)

Appropriate cell size

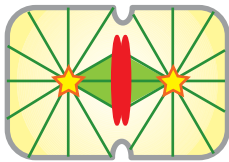

Formation of  
mitotic spindle

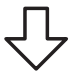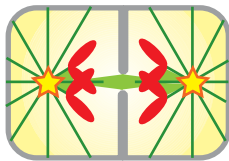

Chromosome  
segregation

Too large of a cell

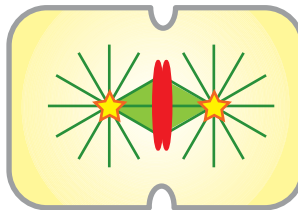

Astral microtubules  
do not reach cortex

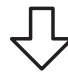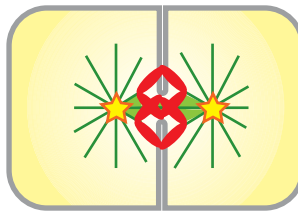

Insufficient spindle  
elongation (?)

Too small of a cell

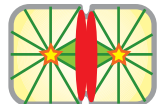

Elongation of  
spindle is short

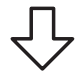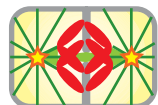

Insufficient chromosome  
segregation

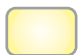

Cell

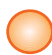

Nucleus

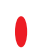

Chromosome

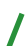

Microtubule

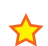

Centrosome

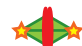

Mitotic spindle
